# Supplementary material for: Mechanical versus manual chest compressions in the treatment of in-hospital cardiac arrest patients in a non-shockable rhythm: a randomised controlled feasibility trial (COMPRESS-RCT)
Source: PubMed Central journal article supplement (PMC6117876; doi:10.1186/s13049-018-0538-6), 2018-08-30
Supplement: 13049_2018_538_MOESM1_ESM.pdf [file 13049_2018_538_MOESM1_ESM.pdf]

## Appendix two- formulae for feasibility outcomes

Formula one:

$$\textit{Proportion of eligible patients randomised during operational hours} = \frac{\textit{Number of randomised patients}}{\textit{Number of eligible patients during operational recruitment hours}}$$

Formula two:

$$\textit{Proportion of eligible patients randomised} = \frac{\textit{Number of randomised patients}}{\textit{Number of eligible patients}}$$

Formula three:

$$\textit{Proportion of patients randomised outside of working hours} = \frac{\textit{Number of patients randomised outside of working hours}}{\textit{Number of randomised patients}}$$

Formula four

$$\textit{Proportion of patients or consultees agreeing to ongoing study participation} = \frac{\textit{Number of patients where option one or two selected}}{\textit{Number of patients approached for agreement}}$$

Formula five (measured at discharge and six-months)

$$\textit{Proportion of patients adequately blinded (1)} = \frac{\textit{Number of patients reporting definitely know whether or not treated with mechanical device}}{\textit{Number of patients completing questionnaire}}$$

Formula six (measured at discharge and six-months)

$$\text{Proportion of patients adequately blinded (2)} = \frac{\text{Number of patients accurately predicting treatment arm}}{\text{Number of patients completing questionnaire}}$$

Formula seven (measured at discharge and six-months)

$$\text{Proportion of patients with complete follow – up data} = \frac{\text{Number of patients with complete follow – up data}}{\text{Number of alive randomised patients}}$$

Formula eight

$$\text{Proportion of patients with analysable chest compression quality data} = \frac{\text{Number of patients with analysable chest compression quality data}}{\text{Number of randomised patients}}$$
